# Supplementary material for: Mutations in the Plasmodium falciparum chloroquine resistance transporter, PfCRT, enlarge the parasite’s food vacuole and alter drug sensitivities
Source: PubMed Central journal article supplement (PMC4588581; doi:10.1038/srep14552), 2015-09-30
Supplement: srep14552-s1.pdf [file srep14552-s1.pdf]

## Supplementary data:

### **Mutations in the *Plasmodium falciparum* chloroquine resistance transporter, PfCRT, enlarge the parasite's food vacuole and alter drug sensitivities**

**Serena Pulcini<sup>1+</sup>, Henry M. Staines<sup>1+</sup>, Andrew H. Lee<sup>2</sup>, Sarah H. Shafik<sup>3</sup>, Guillaume Bouyer<sup>1,4,5</sup>, Catherine M. Moore<sup>1</sup>, Daniel A. Daley<sup>6</sup>, Matthew J. Hoke<sup>6</sup>, Lindsey M. Altenhofen<sup>7</sup>, Heather J. Painter<sup>7</sup>, Jianbing Mu<sup>8</sup>, David J. P. Ferguson<sup>9</sup>, Manuel Llinás<sup>7</sup>, Rowena E. Martin<sup>3</sup>, David A. Fidock<sup>2,10</sup>, Roland A. Cooper<sup>6,11</sup> & Sanjeev Krishna<sup>1\*</sup>**

<sup>1</sup> Institute for Infection and Immunity, St. George's, University of London, London SW17 0RE, UK.

<sup>2</sup> Department of Microbiology and Immunology, Columbia University Medical Center, New York, NY 10032, USA.

<sup>3</sup> Research School of Biology, Australian National University, Canberra, ACT 2601, Australia.

<sup>4</sup> Sorbonne Universités, UPMC Univ. Paris 06, UMR 8227, Integrative Biology of Marine Models, Comparative Physiology of Erythrocytes, Station Biologique de Roscoff, Roscoff, France.

<sup>5</sup> CNRS, UMR 8227, Integrative Biology of Marine Models, Comparative Physiology of Erythrocytes, Station Biologique de Roscoff, Roscoff, France.

<sup>6</sup> Department of Biological Sciences, Old Dominion University, Norfolk, VA 23529, USA.

<sup>7</sup> Department of Biochemistry and Molecular Biology and Center for Malaria Research, Pennsylvania State University, State College, Pennsylvania 16802, USA.

<sup>8</sup> Laboratory of Malaria and Vector Research, National Institute of Allergy and Infectious Diseases, National Institutes of Health, Rockville MD 20852, USA.

<sup>9</sup> Nuffield Department of Clinical Laboratory Sciences, University of Oxford, John Radcliffe Hospital, Oxford OX3 9DU, UK.

<sup>10</sup> Division of Infectious Diseases, Department of Medicine, Columbia University Medical Center, New York, NY 10032, USA.

<sup>11</sup> Department of Natural Sciences and Mathematics, Dominican University of California, San Rafael, CA 94901, USA.

**\*these authors contributed equally to this work**

**\*corresponding. [s.krishna@sgul.ac.uk](mailto:s.krishna@sgul.ac.uk)**

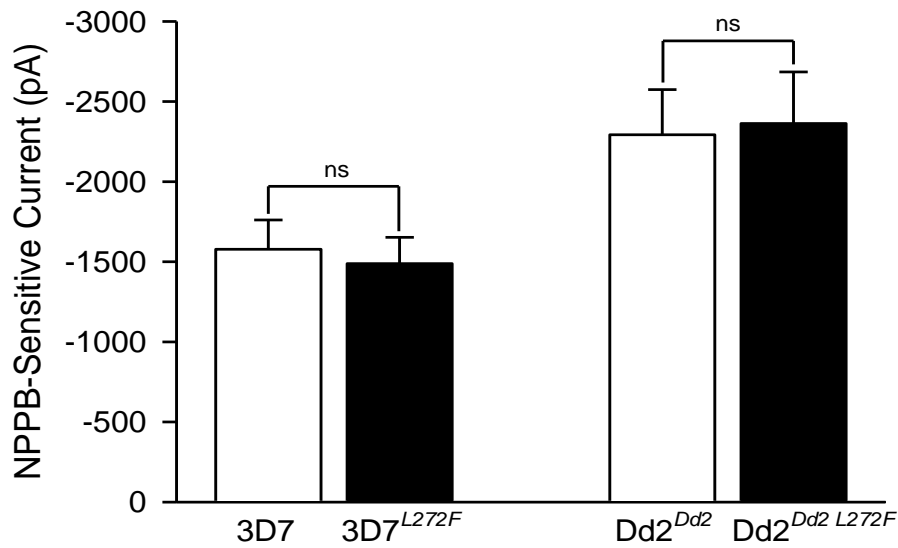

### Supplementary Figure S1 | Electrophysiological properties of parasite lines.

*Plasmodium* parasites are known to alter the permeability of their host's RBC plasma membrane<sup>1</sup>. This altered permeability is characterised by increased transport of a range of structurally unrelated solutes, with a preference for anions over electroneutral and cationic solutes<sup>2</sup>. Using electrophysiological technologies, infected RBCs exhibit greatly increased anionic currents, particularly at negative membrane potentials, that can be inhibited by non-specific anion transport blockers such as 5-nitro-2-(3-phenylpropylamino) benzoic acid (NPPB)<sup>3</sup>. BSD pressure has been shown to reduce parasite-induced RBC plasma membrane currents by altering expression of *clag3*.<sup>14, 5, 6</sup>, thus electrophysiological studies were undertaken to compare 3D7 and 3D7<sup>L272F</sup> and Dd2<sup>Dd2</sup> and Dd2<sup>Dd2 L272F</sup>-infected RBCs. The ruptured patch whole-cell voltage-clamp configuration was used to record membrane currents<sup>7</sup>. All experiments were performed at room temperature. Patch pipettes (tip resistances 6 to 12 MΩ) were prepared from borosilicate glass capillaries pulled and polished on a Werner Zeitz DMZ programmable puller. The bath solution contained 155 mM NaCl, 1.4 mM CaCl<sub>2</sub>, 1 mM MgCl<sub>2</sub>, 10 mM HEPES, 10 mM glucose (pH 7.4, 310 ± 5 mOsm/kg H<sub>2</sub>O). The pipette solution was of the same composition, with the one exception that 1.4 mM CaCl<sub>2</sub> was replaced with 0.5 mM EGTA. A 2 ml aliquot of infected RBC suspension (0.001% hematocrit) was placed in a 35 mm Petri dish and left while the RBCs settled. Having obtained a seal (5-15 GΩ) on an infected RBC, the cell was lifted off the bottom of the dish and the patch ruptured by brief application of negative pressure, to attain the whole-cell configuration. Whole-cell currents were recorded using an Axopatch 200B amplifier (digitised at 10 kHz and filtered at 5 kHz with a 4-pole Bessel filter), with voltage command protocols generated and the currents analysed using the pCLAMP software suite (Version 10, Molecular Devices). Whole-cell current/voltage (I-V) curves were obtained by evoking a series of V<sub>T</sub> values from -100 to +100 mV in 10 mV steps for 300 ms from a V<sub>H</sub> of 0 mV. Current data were measured over the last 50 ms of each record (*i.e.* 250-300 ms). NPPB-sensitive currents at a V<sub>T</sub> of -100 mV are shown. NPPB was used at a concentration of 100 μM, which on average inhibited 94 ± 2% of the total current (n = 25). Current data were not included if NPPB inhibition was not greater than 75%, suggesting loss of seal. No significant differences (ns) were found between 3D7 (n = 5) and 3D7<sup>L272F</sup> (n = 5) and Dd2<sup>Dd2</sup> (n = 7) and Dd2<sup>Dd2 L272F</sup>-infected RBCs (n = 8), respectively, suggesting no alteration in the permeability of infected RBCs (Students's *t*-test; p > 0.5).

**a**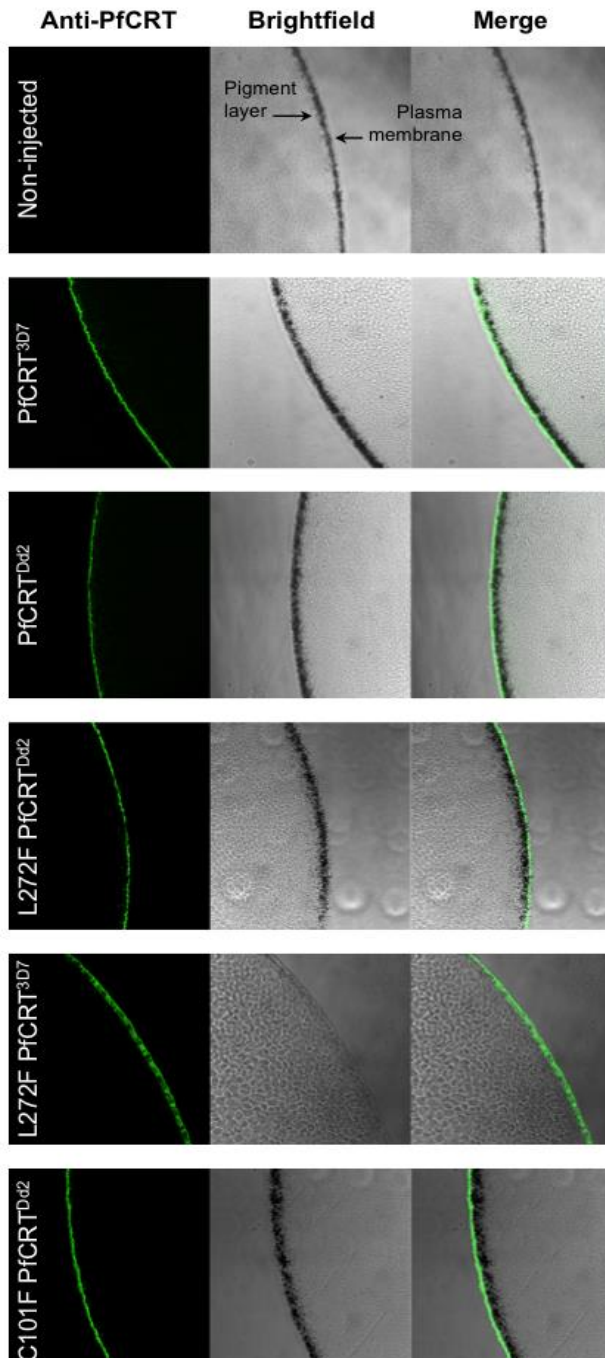

**Supplementary Figure S2 | Expression of the C101F and L272F variants of PfCRT in *Xenopus* oocytes. (a)**

Immunofluorescence microscopy was used to localize L272F PfCRT<sup>Dd2</sup>, L272F PfCRT<sup>3D7</sup>, and C101F PfCRT<sup>Dd2</sup> in the oocyte. In each case, the expression of the PfCRT variant resulted in a fluorescent band external to the pigment layer, indicating that the protein was expressed in the oocyte plasma membrane. The band was not present in non-injected oocytes. **(b)** The level of PfCRT protein in the oocyte membrane was semiquantified using a western blot method<sup>8</sup>. The analysis included PfCRT<sup>Dd2</sup> as a control, to which the other band intensity values were normalized. Levels of PfCRT protein are shown as mean + SEM from three to five separate experiments (in each experiment measurements were averaged from two independent replicates). There were no significant differences in expression levels between constructs ( $p > 0.05$ ); hence, all of the PfCRT variants were present at similar levels in the oocyte membrane.

**b**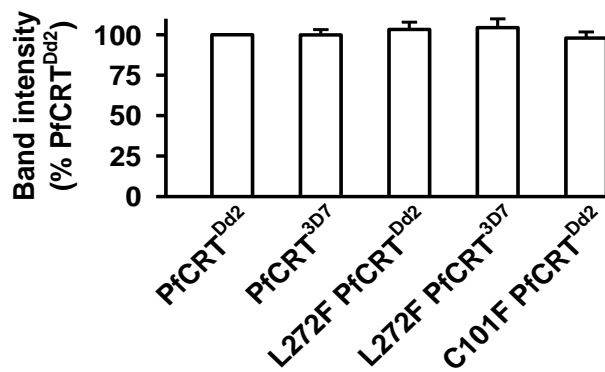

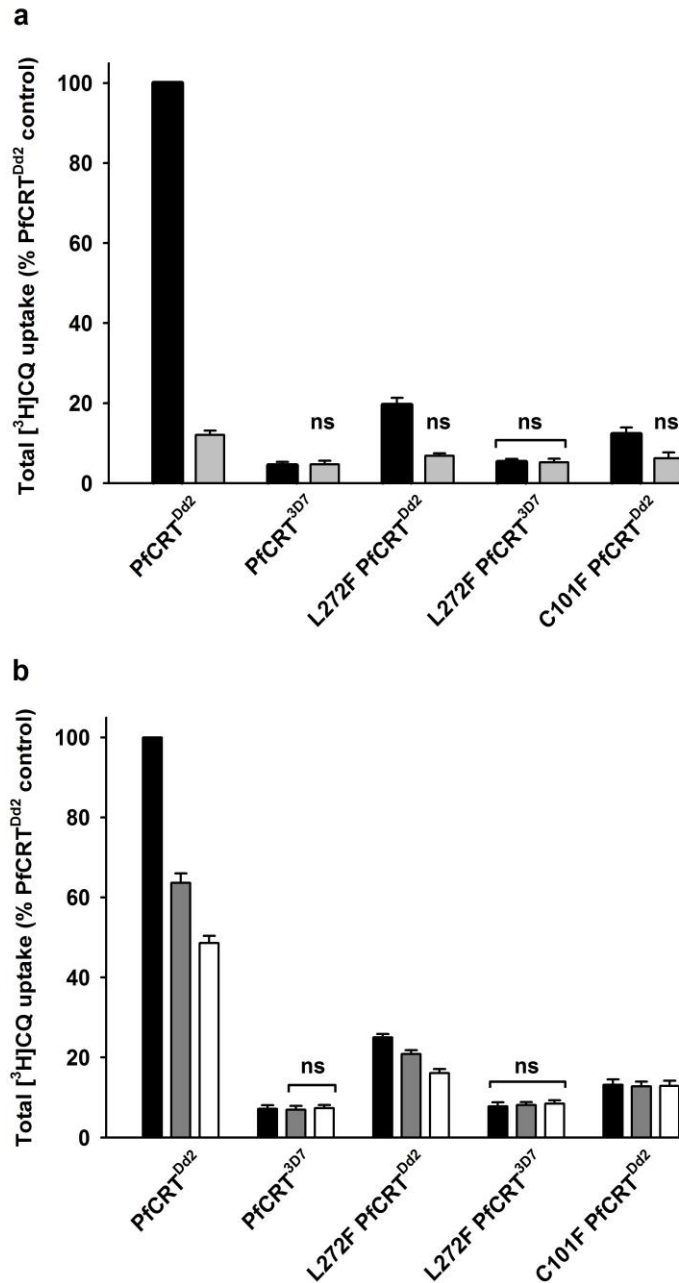

**Supplementary Figure S3 | Total CQ transport activity of the C101F and L272F variants of PfCRT in *Xenopus* oocytes.** (a,b) The uptake of [<sup>3</sup>H]CQ into oocytes expressing PfCRT was measured in the absence (closed bars) or presence of 250 μM VP (light grey bars; a), 100 μM BSD (dark grey bars; b), or 500 μM BSD (open bars; b). Within each experiment, measurements were made from 10 oocytes per treatment and uptake was expressed relative to that measured in the PfCRT<sup>Dd2</sup>-expressing oocytes under control conditions. The normalized data obtained from 4-5 separate experiments (each using oocytes from different frogs) were then averaged and are shown + SEM. These data are total CQ uptake (*i.e.* both CQ accumulation attributable to diffusion and that via PfCRT). In the control treatments, the rates of CQ uptake (pmol/oocyte/h;  $n = 9 \pm \text{SEM}$ ) in oocytes expressing PfCRT<sup>Dd2</sup> and PfCRT<sup>3D7</sup> were  $23.6 \pm 2.3$  and  $1.3 \pm 0.2$ , respectively. 'ns' denotes no significant difference ( $p > 0.05$ ) in CQ accumulation between oocytes expressing a PfCRT variant (in the presence or absence of VP or BSD) and that measured in the PfCRT<sup>3D7</sup>-expressing oocytes under control conditions.

**Supplementary Table S1 | Primers used for sequencing of PfCRT in 3D7 parasites**

| <b>Name</b> | <b>Sequence (5' to 3')</b> | <b>Direction</b> | <b>Product (bp)</b> |
|-------------|----------------------------|------------------|---------------------|
| <b>Crt1</b> | CCGTTAATAATAAATACACGCAG    | Forward          | 540                 |
| <b>Crt2</b> | GTTCTTGTAAGACCTATGAAGGCC   | Reverse          |                     |
| <b>Crt3</b> | ATCCATGTTAGATGCCTGTTTCAGTC | Forward          | 479                 |
| <b>Crt4</b> | CCCAAGAATAAACATGCGAAACC    | Reverse          |                     |
| <b>Crt5</b> | GCTTTTCAAACATGACAAGGG      | Forward          | 581                 |
| <b>Crt6</b> | CGACGTTGGTTAATTCTCCTTC     | Reverse          |                     |
| <b>Crt7</b> | GTCTTATATTACCTGTATACACCC   | Forward          | 600                 |
| <b>Crt8</b> | CCTTATAAAGTGTAATGCGATAGC   | Reverse          |                     |

**Supplementary Table S2 | PCR verification primers for transfection experiments**

| <b>Name</b>  | <b>Sequence (5' to 3')</b>                                   |
|--------------|--------------------------------------------------------------|
| <b>p3264</b> | CTTGAATTCGACCTTAACAGATGGCTCAC                                |
| <b>p3265</b> | CTTATCGATAAGCAGAAGAACATATTAATAGGAATACTTAATTG                 |
| <b>p3315</b> | CTCGAGATGGTTGGTTCGCTAAACTGC                                  |
| <b>p3403</b> | TTGACCCTTATATATTCCACCCA                                      |
| <b>p3404</b> | CTTGGGCCCAAGTTGTACTGCTTCTAAGC                                |
| <b>p3527</b> | CCTGTATACACCCTTCCATTTTTAAAAGAATTTTCATTTACCATATAATGAAATATGGAC |
| <b>p3528</b> | GTCCATATTTTCATTATATGGTAAATGAAATTCTTTTAAAAATGGAAGGGTGTATACAGG |

## References - Supplementary data

1. Ginsburg, H., Krugliak, M., Eidelman, O. & Cabantchik, Z. I. New permeability pathways induced in membranes of *Plasmodium falciparum*-infected erythrocytes. *Mol Biochem Parasitol* **8**, 177-190 (1983).
2. Kirk, K., Horner, H. A., Elford, B. C., Ellory, J. C. & Newbold, C. I. Transport of diverse substrates into malaria-infected erythrocytes via a pathway showing functional characteristics of a chloride channel. *J Biol Chem* **269**, 3339-3347 (1994).
3. Staines, H. M. *et al.* Electrophysiological studies of malaria parasite-infected erythrocytes: current status. *Int J Parasitol* **37**, 475-482 (2007).
4. Hill, D. A. *et al.* A blasticidin S-resistant *Plasmodium falciparum* mutant with a defective plasmodial surface anion channel. *Proc Natl Acad Sci U S A* **104**, 1063-1068 (2007).
5. Mira-Martinez, S. *et al.* Epigenetic switches in *clag3* genes mediate blasticidin S resistance in malaria parasites. *Cell Microbiol* **15**, 1913-1923 (2013).
6. Sharma, P. *et al.* An epigenetic antimalarial resistance mechanism involving parasite genes linked to nutrient uptake. *J Biol Chem* **288**, 19429-19440 (2013).
7. Staines, H. M. *et al.* Solute transport via the new permeability pathways in *Plasmodium falciparum*-infected human red blood cells is not consistent with a simple single-channel model. *Blood* **108**, 3187-3194 (2006).
8. Summers, R. L. *et al.* Diverse mutational pathways converge on saturable chloroquine transport via the malaria parasite's chloroquine resistance transporter. *Proc Natl Acad Sci U S A* **111**, E1759-1767 (2014).
